# Supplementary material
Source: publisher figshare collection journal article supplement (https://tandf.figshare.com/ndownloader/files/21892218)

**Green Chemistry Letters and Reviews**

**Supporting information**

**Facile synthesis of tetrazoles catalyzed by the new copper nano-catalyst**

**Vahideh Khorramabadia, Davood Habibib*, Somayyeh Heydariab**

**a**Department of Organic Chemistry, Faculty of Chemistry, Bu-Ali Sina University, Hamedan, 6517838683 Iran

**b**Department of research and development of **the** Faran Shimi pharmaceutical company, Tuyserkan, Iran

*Corresponding author, E-mail address: davood.habibi@gmail.com, Tel: +98 81 38380922; Fax: +98 81 38380709

Content Page

IR & HNMR of **2a** 2

IR & HNMR of **2c** 3

IR & HNMR of **2e** 4

IR & HNMR of **2f** 5

IR & HNMR of **2g** 6

IR & HNMR of **2h** 7

IR & HNMR of **2i** 8

IR & HNMR of **2j** 9

IR of **2a**: 1-Phenyl-1*H*-tetrazole


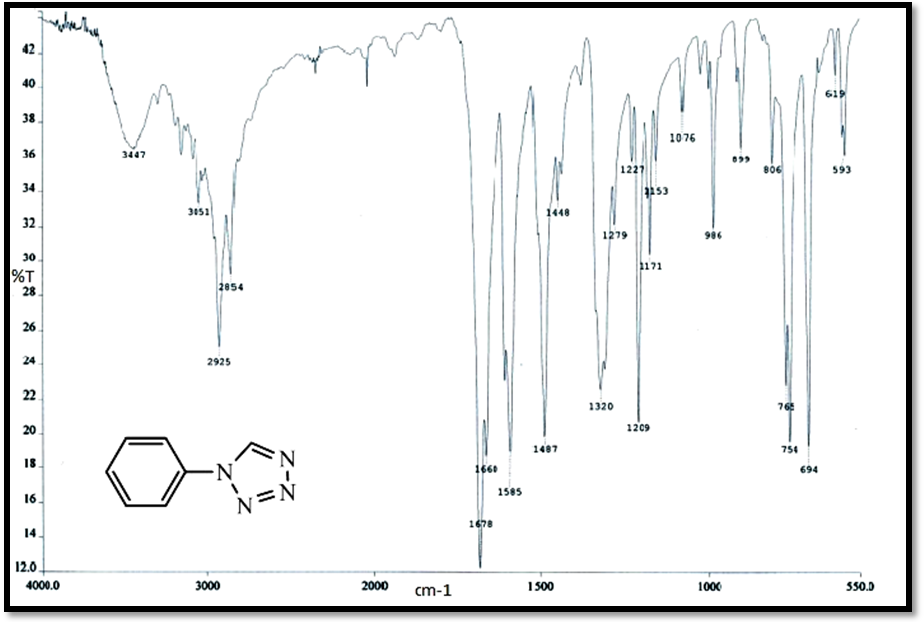


HNMR of **2a**


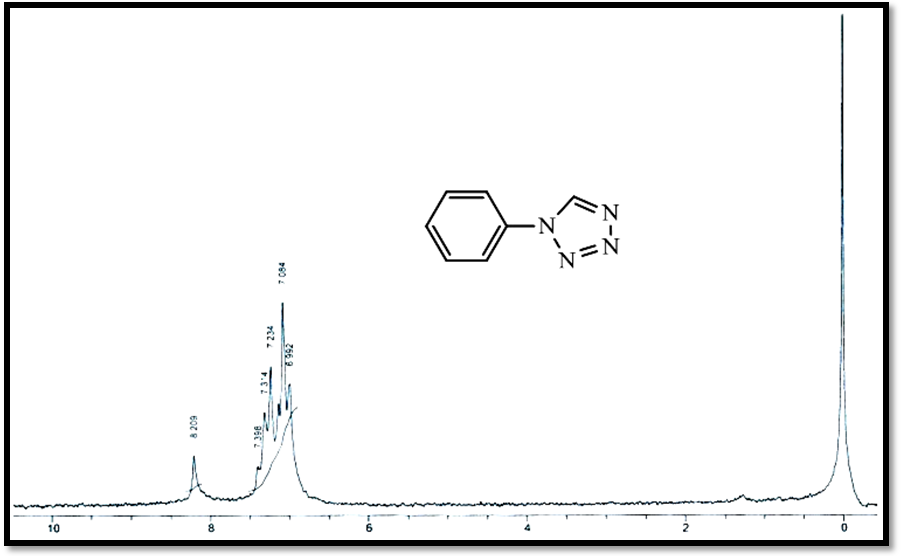


IR of **2C:** 1-(4-Methylphenyl)-1*H*-tetrazole


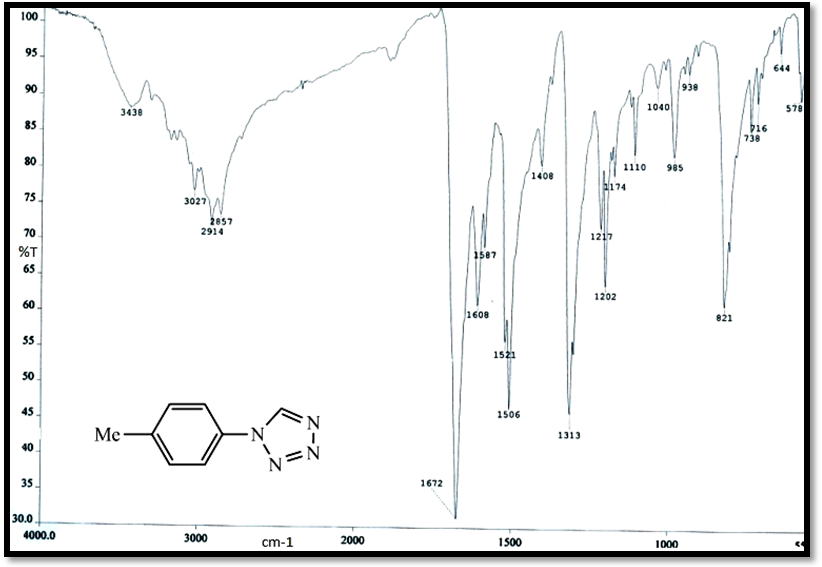


HNMR of **2C**

**
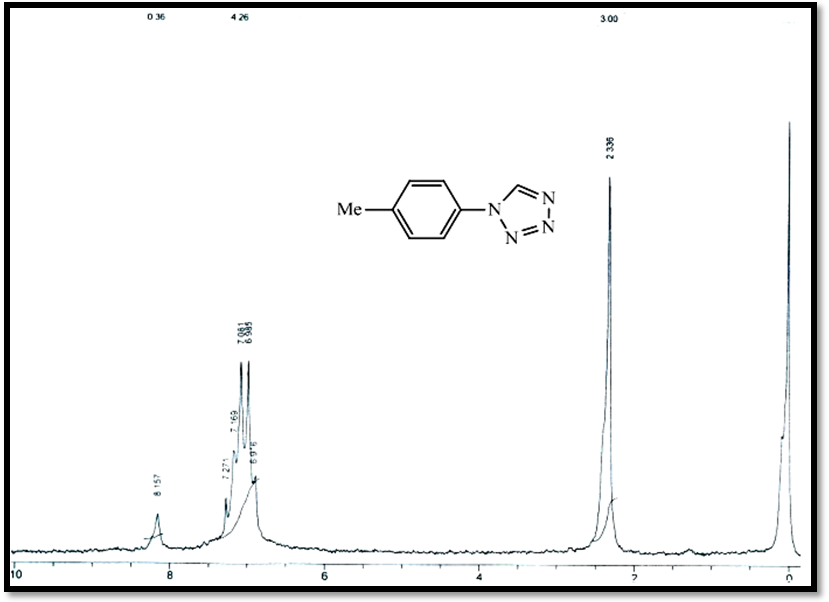
**

IR of **2e:** 1-(4-Acetylphenyl)-1*H*-tetrazole


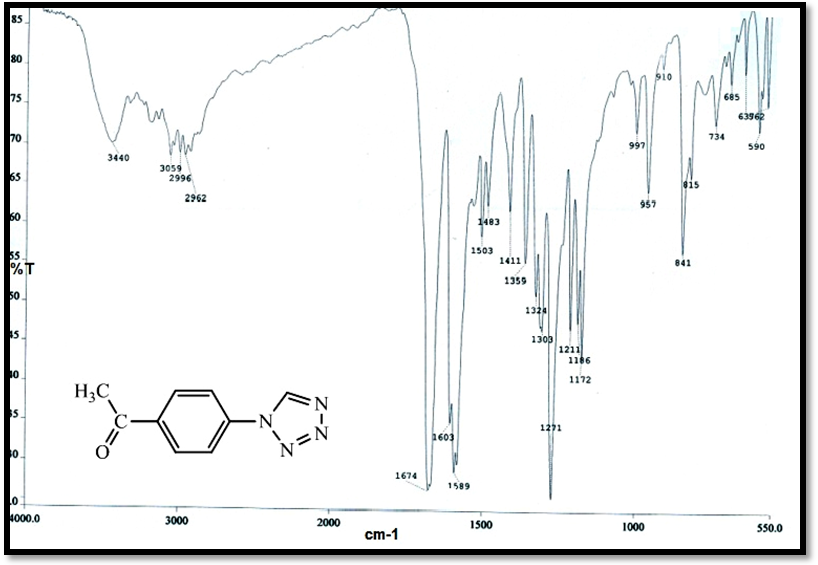


HNMR of **2e**


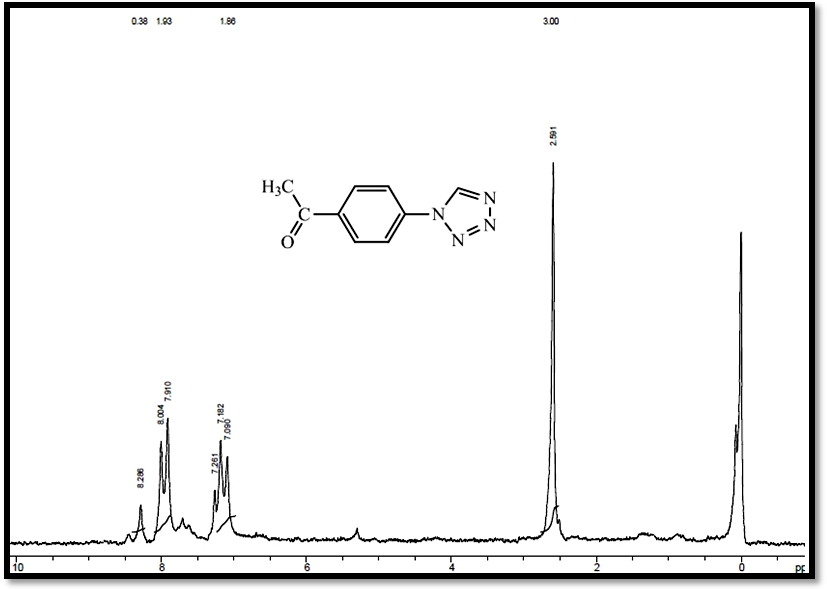


IR of **2f:** 1-(4-Bromophenyl)-1*H*-tetrazole


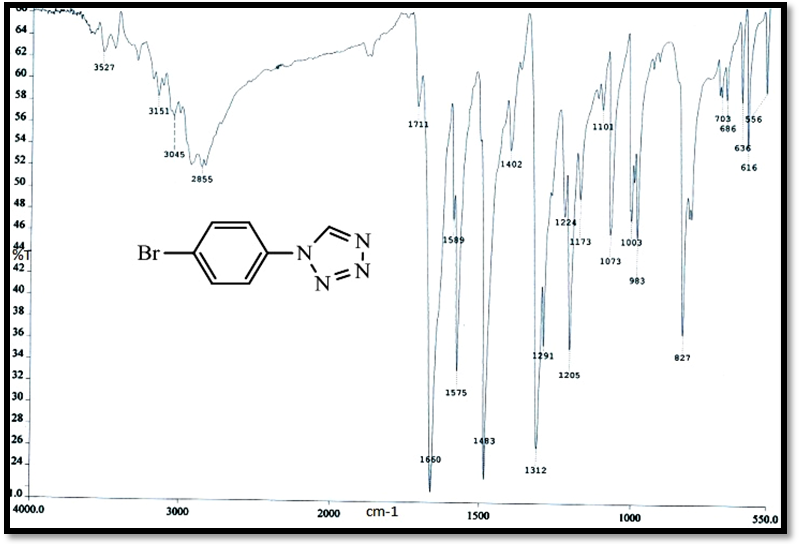


HNMR of **2f**


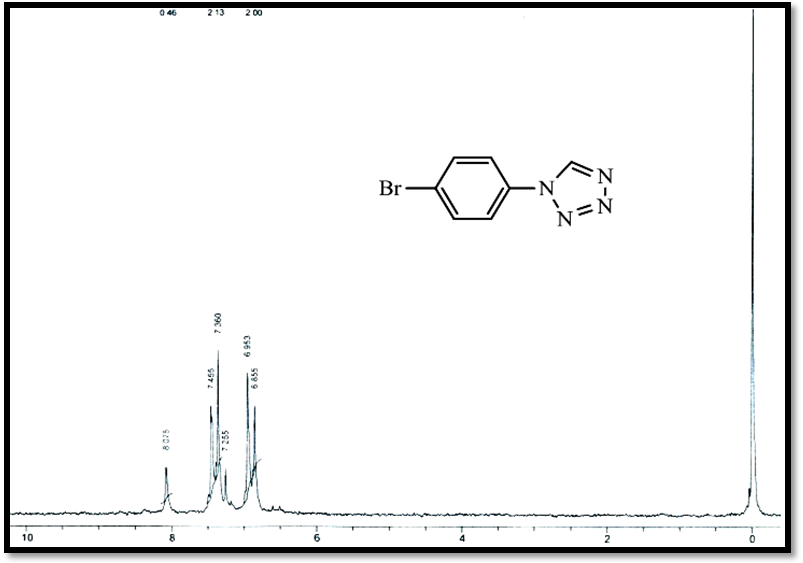


IR of **2g:** 1-(2-Chlorophenyl)-1*H*-tetrazole


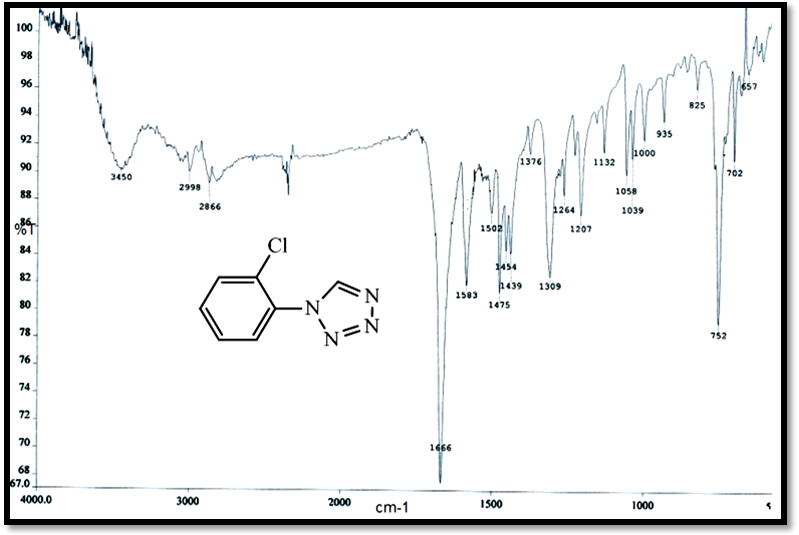


HNMR of **2g**


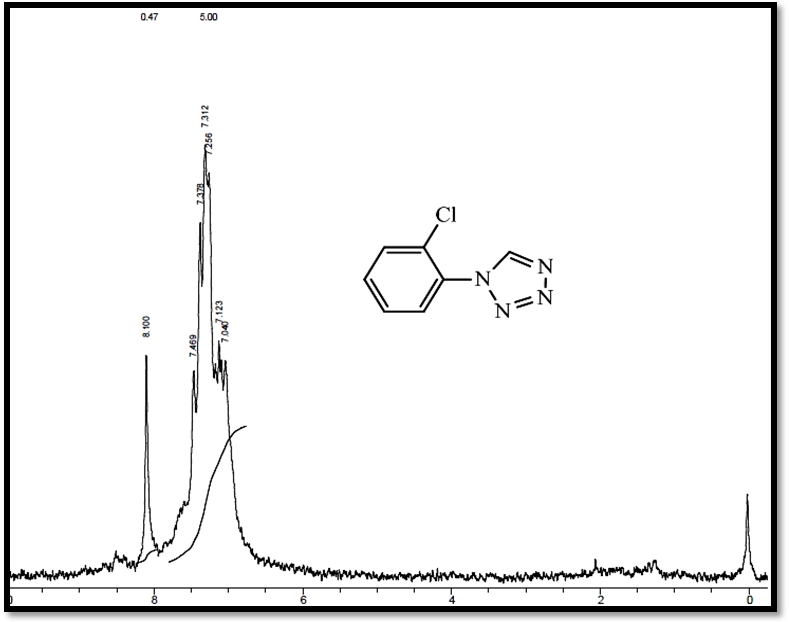


IR of **2h:** 1-(4-Chlorophenyl)-1*H*-tetrazole


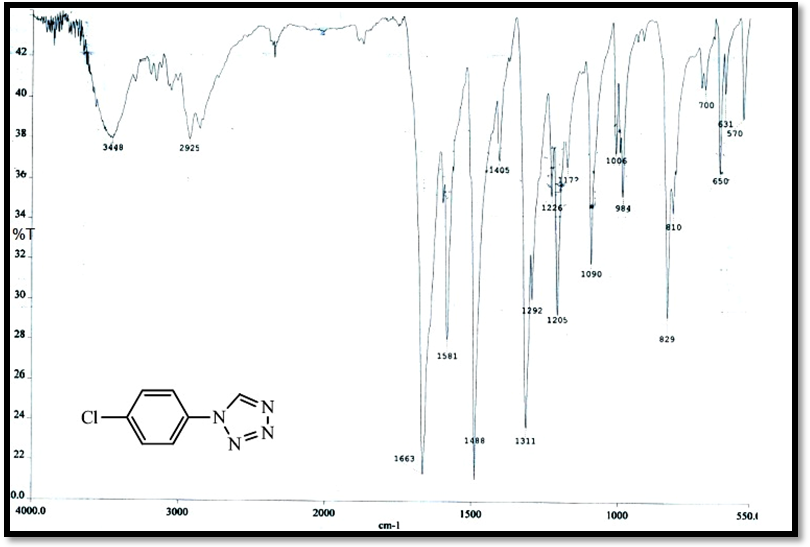


HNMR of **2h**


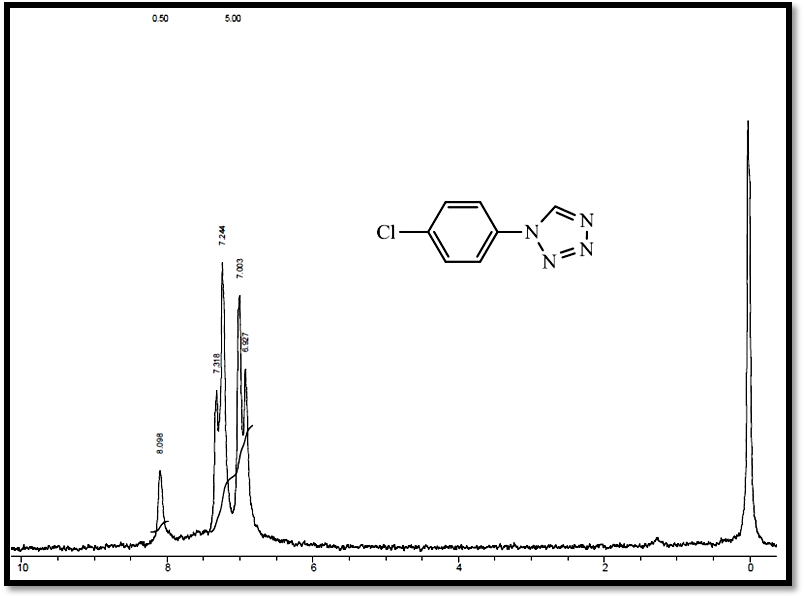


IR of **2i:** 1-(4-Nitrophenyl)-1*H*-tetrazole


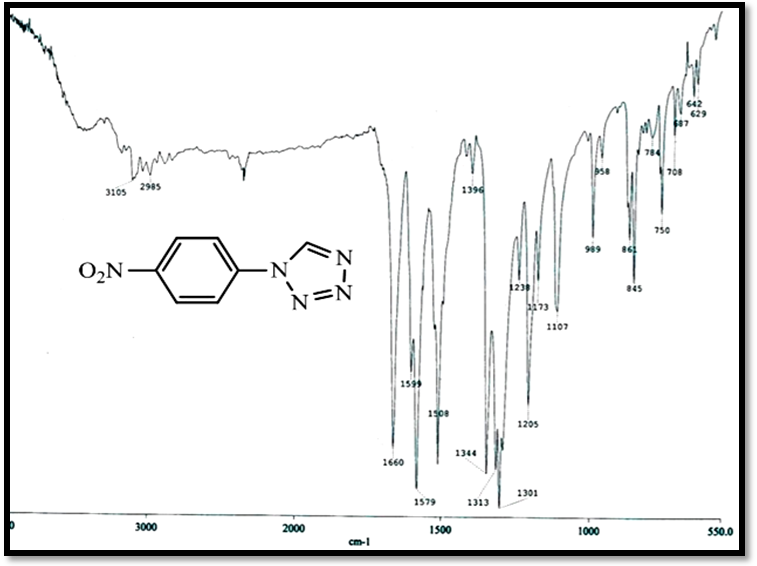


HNMR of **2i**


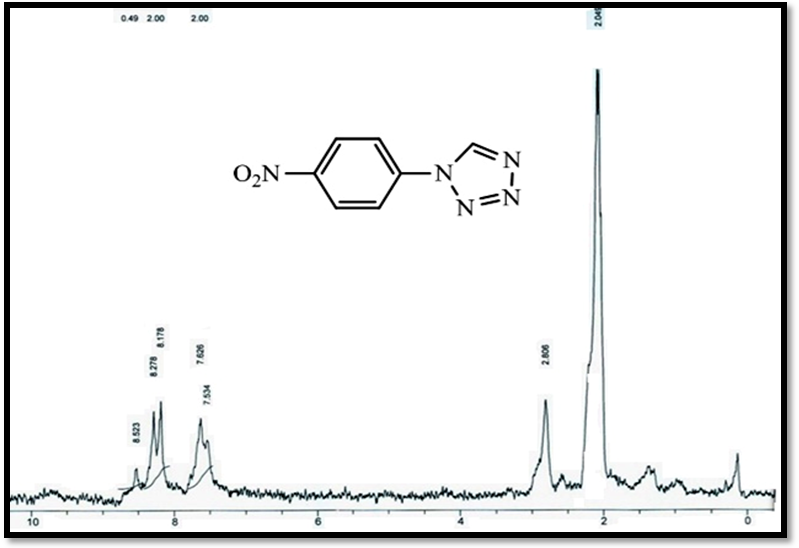


IR of **2j:** 1-(3-Trifluoromethylphenyl)-1*H*-tetrazole


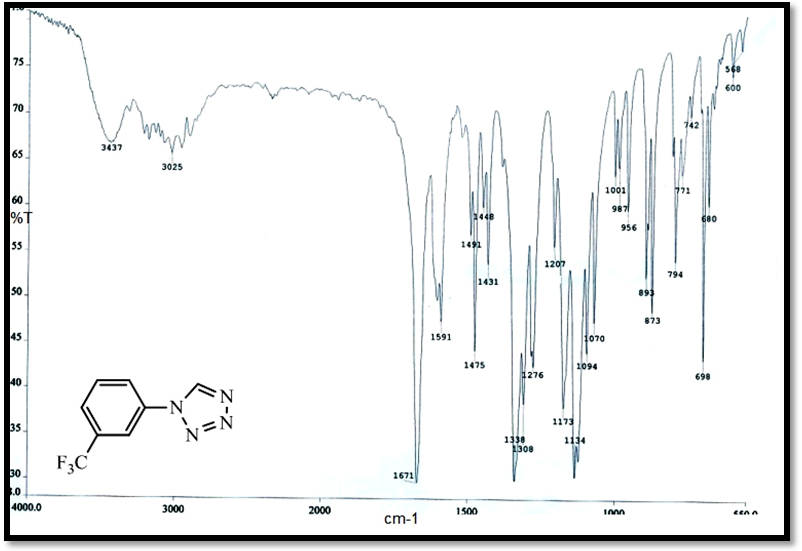


HNMR of **2j**


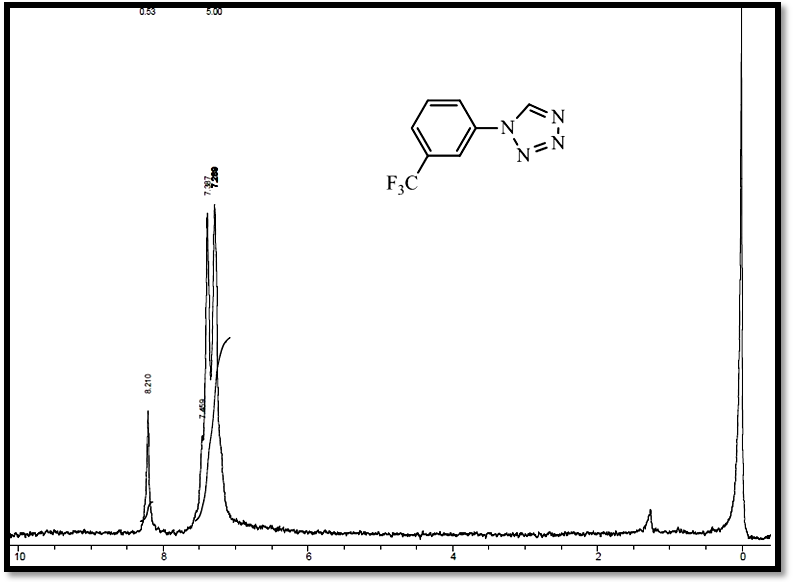

Supplement: Supplementary file 1 [file 21892218]
